# Supplementary material for: An exploration of knowledge, attitudes and advice given by health professionals to parents in Ireland about the introduction of solid foods. A pilot study
Source: Springer Nature journal article supplement (doi:10.1186/1471-2458-10-201), 2010-04-21
Supplement: Additional file 1 [file 1471-2458-10-201-s1.doc]

**Questionnaire used.**

**Please tick to indicate your answer. Write further comments where applicable.**

**Demographics and Personal Experience**

| 1.1 | What is your profession? |  General Practitioner   Practice Nurse   Public Health Nurse   Dietitian |
| --- | --- | --- |
| 1.2 | How many years have you been working in your present professional role? |  0-5  6-10   11-15  16 – 20   21-25  over 26 |
| 1.3 | What is your gender? |  Male  Female |
| 1.4 | Were you trained for your present professional role in Ireland? |  Yes  No |
| 1.5 | Have you worked in your present professional role in any country other than in Ireland? |  Yes   No  If yes, which country? …............................................. |
| 1.6 | Are you a parent? |  Yes  No |
| 1.7 | How were your children fed as in the first six weeks of life? |  Not Applicable   Breastfed  Formula-fed   Mixed breast- and formula-fed |
| 1.8 | When did you introduce solid foods with your own children? |  Not Applicable  1st child, age in weeks  2nd child, age in weeks  3rd child, age in weeks  4th child, age in weeks |
| 1.9 | What was the first solid food you offered your own children? |  Not Applicable  1st child …………………….  2nd child …………………….  3rd child …………………….  4th child …………………….. |
| 1.10 | Please tick how you feel about the statement: ***“My personal experience of weaning influences the advice I give to parents”*** |  Not Applicable   Strongly Agree   Agree   Neither Agree nor Disagree   Disagree   Strongly Disagree |

Professional Experience of Weaning

| 2.1 | Do you consider that discussing weaning is part of your professional role? |  No, it is not part of my role   Yes, I routinely raise the topic   Yes, but only if a parent asks   Yes, if parents are referred to me for weaning advice |
| --- | --- | --- |
| 2.2 | How many times a week would you typically discuss weaning? |  Never     Rarely  0-5 times   6-10 times ⁪  11- more times |
| 2.3 | Who or what do you believe most influences a first-time mother regarding the introduction of solid foods?  Please tick the **THREE** that you consider most important |  Her partner ⁭ Her friends⁭   Her mother ⁭ Books   Her family  Internet   Her level of education   Magazines  Media   Practice Nurse  GP   PHN ⁭  Dietitian   Paediatrician⁭ Area Medical Officer   Other…………………. |
| 2.4 | At which infant age or surgery, clinic or home visit do you usually discuss weaning? |  I never discuss weaning   Soon after birth   2 weeks  6 weeks ⁪   2 months  3 months   4 months  Other |
| 2.5 | Who do you most usually advise or discuss weaning with? |  I never discuss weaning   Mother  Father   Other family member   Don’t know |
| 2.6 | Do you usually advise or discuss weaning with each baby or just first-time? |  I never discuss weaning   First baby   Each baby |
| 2.7 | Would you like to have a specific visit or consultation to discuss weaning? |  Yes  No  If yes, please specify when you feel that it would be most effective ………………………………… |
| 2.8 | Are you aware of any published official national guidelines regarding weaning? |  Yes  No  If yes, please specify name of publication ……………………………………….. |
| 2.9 | Name any weaning or complementary infant feeding literature you give to parents |  I never discuss weaning   The literature I give is ……….…….………………………….  ………………………………………… |
| 2.10 | At what approximate age (infant’s age in weeks) do you recommend solid foods be introduced?  Please also state a minimum age if this differs from the age you prefer to recommend. | Age in weeks for a baby who is exclusively breastfed? Minimum?  Age in weeks for baby who is formula-fed? Minimum?  Age in weeks for a baby who is mixed milk feeding (breastfed and formula-fed)? Minimum? |
| 2.11 | What factors other than the baby’s age do you consider when giving advice about when to start weaning?  Please tick the **three** factors that you consider most important |  I never discuss weaning     Baby’s birth weight   Baby’s current weight   Baby’s velocity of weight gain   Crossing of centile lines   Baby waking at night   Baby taking large volumes of formula⁪   Reflux in the baby   Baby’s frequency of feeding   Baby’s crying   Baby’s head control   Baby’s sex   Family’s medical history   Family’s ethnicity/culture   Mother’s wishes   Other  ………………………………………. |
| 2.12 | At what age do you recommend cup-feeding be introduced? |  I never discuss cup-feeding    Infant’s age in weeks |
| 2.13 | What do you say to parents to about commercial baby foods? |  I never discuss weaning   Convenient  Expensive   Nutritious  Use family foods   Ok to use in moderation   Other………………….. |
| 2.14 | Do you use a centile chart to plot baby’s weight? |  Yes  No  If yes, please specify which chart  …………………………………. |
| 2.15 | Do you recommend vitamin supplementation for infants? |  Yes  No  If yes, please specify what and when  ……………………………………. |
| 2.16 | What food type do you suggest might be introduced as a first food? |  I never discuss weaning   Cereals  Fruits   Vegetables  Meat   Eggs  Rusks   Other………………….. |
| 2.17 | For each of these foods, what approximate infant’s age (in weeks) do you suggest to parents that these foods may be introduced? |  I never discuss weaning  Wheat-based cereals  Rice-based cereals  Pasteurised Cow’s milk  Red meat Poultry  Fish Eggs  Yoghurt Honey  Fruit Vegetables  Nuts Rusks |
| 2.18 | Do you consider there to be health risks from weaning early? |  Yes  No  Don’t know  If yes, please specify risks  …………………………………… |
| 2.19 | Do you consider there to be health risks from weaning late? |  Yes  No  Don’t know  If yes, please specify risks  …………………………………… |

**Training**

| 3.1 | In the last two years, how have you acquired knowledge on weaning? |  Professional journals   HSE leaflets   Infant formula manufacturers’ leaflets  Infant formula manufacturers’ events   Internet   General media   Child Nutrition Panel   Discussions with colleagues   HSE Study Days (please specify)  ……………………………..   Other (please specify)  ………………………………….. |
| --- | --- | --- |
| 3.2 | What has been the greatest source of your infant weaning knowledge?  Please tick the **ONE** factor that you consider most important |  Personal experience ⁪   Undergraduate training   Postgraduate training   Professional experience ⁪   Other (please specify)  …………………………………….. |
| 3.3 | Please tick how you feel about the statement: ***“I feel confident to give advice on the introduction of solid foods to infants”*** |  Strongly Agree   Agree   Neither Agree nor Disagree   Disagree   Strongly Disagree |

**Thank you for taking the time to complete this questionnaire**
